# Supplementary material
Source: Research Square preprint supplement (doi:10.21203/rs.3.rs-8936508/v1)

**Figure S1. Analysis of cell proportions stratified by metastatic status.**

Stacked bar plot comparing the relative proportions of major cell types between the LNM- and LNM+ groups. No significant lineage-specific expansion was observed at the major cell type level.

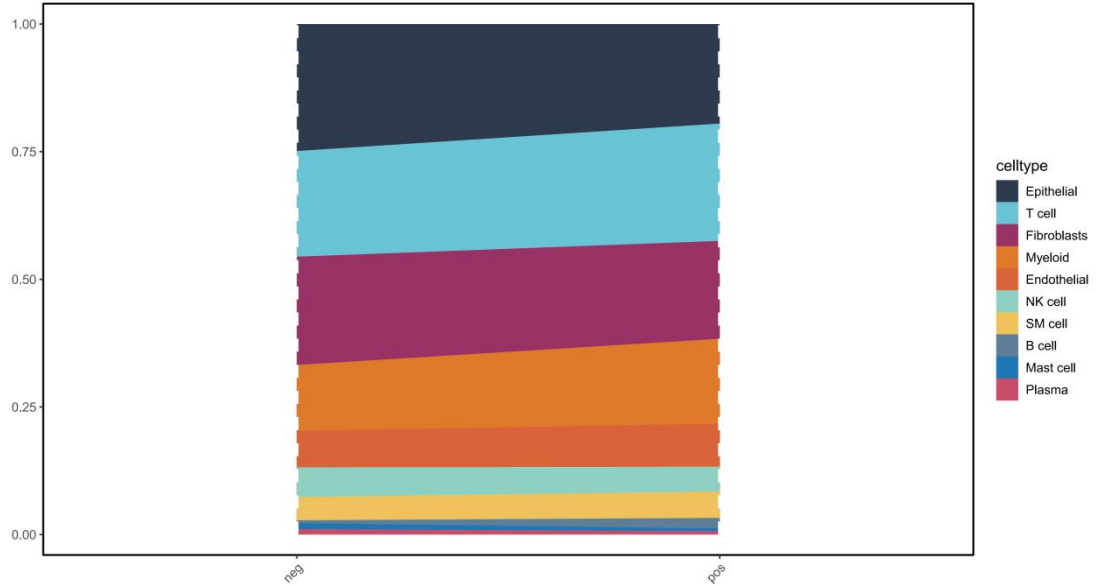

**Figure S2. UMAP plot showing cell distribution colored by LNM status (positive vs. negative), indicating enrichment of the PLA2G2A+ sub-cluster in the positive group.**

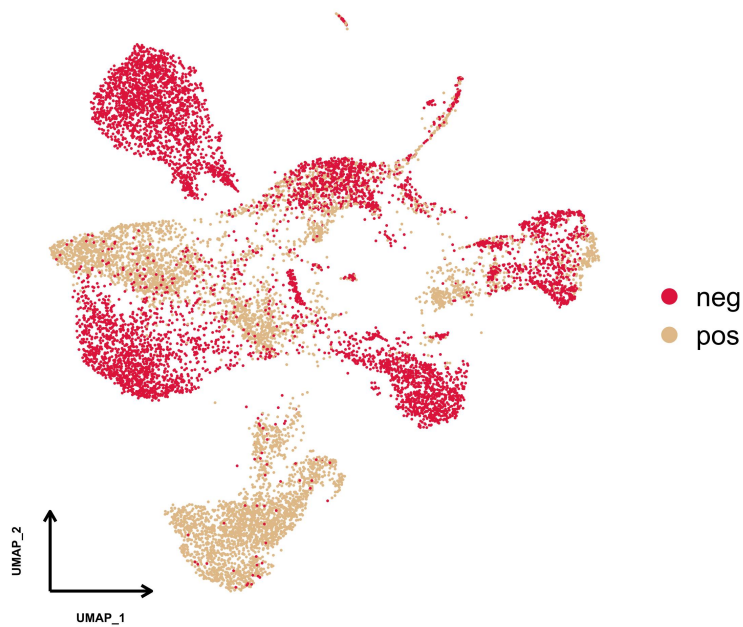

**Figure S3.** Feature plot illustrating the expression distribution of the PLA2G2A gene across fibroblast sub-clusters.

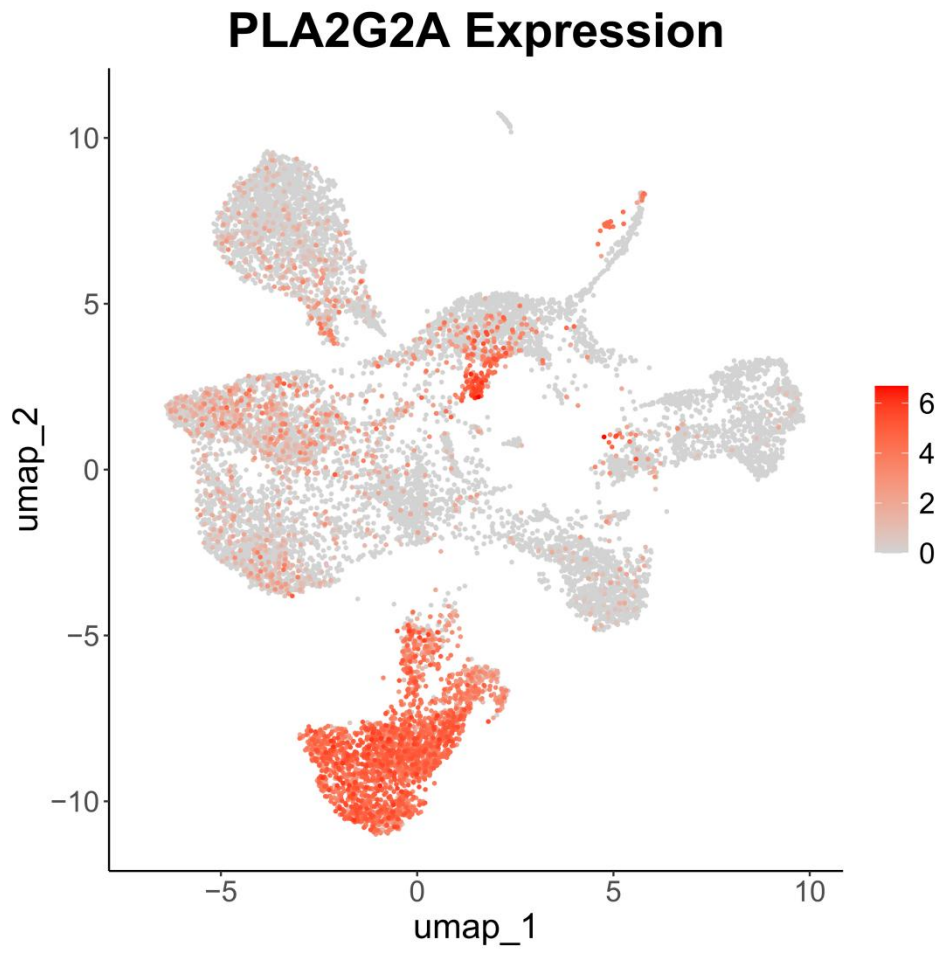

Supplement: Supplementary file 1 [file 07f0a8e18f25d1033125c123.pdf]
